# Supplementary material for: Why Not Pedal for the Planet? The Role of Perceived Norms for Driver Aggression as a Deterrent to Cycling
Source: MDPI journal article supplement (doi:10.3390/ijerph20065163), 2023-03-15
Supplement: s1 [file s1]

Table S1  
Detailed breakdown of sample characteristics

| Sample characteristics (N= 426)                 | Frequencies and descriptives                   |
|-------------------------------------------------|------------------------------------------------|
| <b>Demographics</b>                             |                                                |
| Age (years)                                     | M = 43.59<br>SD= 13.59<br>min = 18<br>max = 82 |
| Gender                                          |                                                |
| Male                                            | 206 (49.3%)                                    |
| Female                                          | 212 (50.7%)                                    |
| Education                                       |                                                |
| Some High School                                | 14 (3.3%)                                      |
| Completed High School                           | 41 (9.6%)                                      |
| Vocational Education/Diploma                    | 90 (21.1%)                                     |
| Currently enrolled in a Bachelor degree         | 22 (5.2%)                                      |
| Completed Bachelor degree                       | 135 (31.7%)                                    |
| Currently enrolled in postgraduate studies      | 29 (6.8%)                                      |
| Completed Masters degree                        | 69 (16.2%)                                     |
| Completed Doctorate                             | 26 (6.1%)                                      |
| <b>Work related characteristics</b>             |                                                |
| Full time vs part time employment               |                                                |
| Full time                                       | 285 (67.7%)                                    |
| Part time                                       | 136 (32.3%)                                    |
| Job tenure                                      | M = 9.99<br>SD = 9.06<br>min = 1<br>max = 49   |
| Industry                                        |                                                |
| Education and training                          | 77 (18.2%)                                     |
| Professional, scientific and technical services | 56 (13.2%)                                     |
| Other                                           | 52 (12.3%)                                     |
| Health care and social assistance               | 47 (11.1%)                                     |
| Mining                                          | 30 (7.1%)                                      |
| Administrative and support services             | 26 (6.1%)                                      |
| Transport, postal and warehousing               | 24 (5.7%)                                      |
| Retail trade                                    | 20 (4.7%)                                      |
| Construction                                    | 16 (3.8%)                                      |
| Public administration and safety                | 15 (3.5%)                                      |
| Agriculture                                     | 14 (3.3%)                                      |
| Accommodation and food services                 | 13 (3.1%)                                      |
| Information media and telecommunications        | 8 (1.9%)                                       |

|                                            |                                                |
|--------------------------------------------|------------------------------------------------|
| Arts and recreation services               | 8 (1.9%)                                       |
| Rental, hiring and real estate services    | 7 (1.7%)                                       |
| Manufacturing                              | 5 (1.2%)                                       |
| Electricity, gas, water and waste services | 4 (0.9%)                                       |
| Wholesale trade                            | 2 (0.5%)                                       |
| <b>Transport related characteristics</b>   |                                                |
| Time driver's license held (years)         | M = 25.59<br>SD = 13.59<br>min = 1<br>max = 65 |
| Cycling frequency (in the past 12 months)  |                                                |
| Every day                                  | 17 (4.0%)                                      |
| Most days                                  | 71 (16.7%)                                     |
| Once or twice a week                       | 59 (13.8%)                                     |
| Once or twice a month                      | 71 (16.7%)                                     |
| Once or twice in the year                  | 68 (16.0%)                                     |
| Never                                      | 140 (32%)                                      |

---
